# Supplementary material
Source: Springer Nature journal article supplement (https://www.springermedizin.de/resource/supplementary/12876_2013_1092_MOESM1_ESM.pdf/9438428)

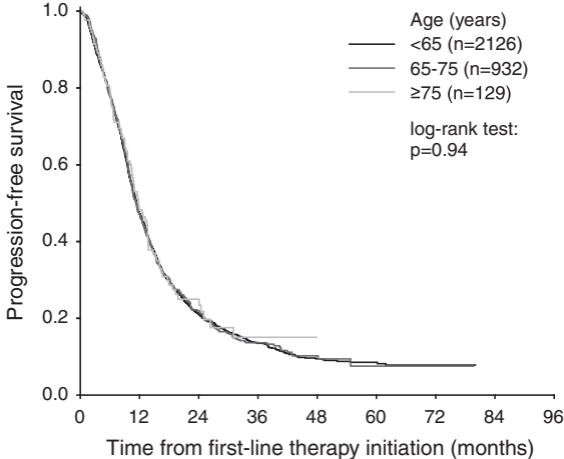

n at risk

|               |     |     |     |    |    |   |   |   |
|---------------|-----|-----|-----|----|----|---|---|---|
| Age <65 years | 865 | 279 | 120 | 48 | 25 | 4 | 0 | 0 |
|---------------|-----|-----|-----|----|----|---|---|---|

|                 |     |     |    |    |   |   |   |   |
|-----------------|-----|-----|----|----|---|---|---|---|
| Age 65-75 years | 371 | 113 | 43 | 13 | 3 | 2 | 0 | 0 |
|-----------------|-----|-----|----|----|---|---|---|---|

|               |    |    |   |   |   |   |   |   |
|---------------|----|----|---|---|---|---|---|---|
| Age ≥75 years | 51 | 16 | 5 | 0 | 0 | 0 | 0 | 0 |
|---------------|----|----|---|---|---|---|---|---|

Supplement: MOESM1 [file 9438428]
